1 **Genetic and physiological mechanisms of freezing tolerance in locally adapted populations**  
2 **of a winter annual**

3

4 Brian J. Sanderson<sup>1</sup>, Sunchung Park<sup>2,4</sup>, M. Inam Jameel<sup>1,5</sup>, Joshua C. Kraft<sup>1</sup>, Michael F.  
5 Thomashow<sup>2</sup>, Douglas W. Schemske<sup>3</sup>, Christopher G. Oakley<sup>1</sup>

6

7 <sup>1</sup> Department of Botany and Plant Pathology and the Purdue Center for Plant Biology, Purdue  
8 University, West Lafayette, IN

9 <sup>2</sup> MSU-DOE Plant Research Laboratory and the Plant Resilience Institute, Michigan State  
10 University.

11 <sup>3</sup> Department of Plant Biology and W. K. Kellogg Biological Station, Michigan State University.

12 <sup>4</sup> Current address: USDA ARS Salinas, CA.

13 <sup>5</sup> Current address: Department of Genetics, University of Georgia, Athens, GA.

14

15

16 Author for correspondence: Christopher G. Oakley, Telephone: 1-765-494-9644; E-mail

17 [oakleyc@purdue.edu](mailto:oakleyc@purdue.edu)

18

19 Manuscript received \_\_\_\_\_; revision accepted \_\_\_\_\_

20

21 **Running Head:** Mechanisms of freezing tolerance in locally adapted populations

22 **ABSTRACT**

23 **Premise of the study:** Despite myriad examples of local adaptation, the phenotypes and genetic  
24 variants underlying such adaptive differentiation are seldom known. Recent work on freezing  
25 tolerance and local adaptation in ecotypes of *Arabidopsis thaliana* from Sweden and Italy  
26 provides the essential foundation for uncovering the genotype-phenotype-fitness map for an  
27 adaptive response to a key environmental stress.

28 **Methods:** Here we examine the consequences of a naturally occurring loss of function (LOF)  
29 mutation in an Italian allele of the gene that encodes the transcription factor *CBF2*, which  
30 underlies a major freezing tolerance locus. We used four lines with a Swedish genetic  
31 background, each containing a LOF *CBF2* allele. Two lines had introgression segments  
32 containing of the Italian *CBF2* allele, and two were created using CRISPR-Cas9. We used a  
33 growth chamber experiment to quantify freezing tolerance and gene expression both before and  
34 after cold acclimation.

35 **Key results:** Freezing tolerance was greater in the Swedish (72%) compared to the Italian (11%)  
36 ecotype, and all four experimental *CBF2* LOF lines had reduced freezing tolerance compared to  
37 the Swedish ecotype. Differential expression analyses identified ten genes for which all *CBF2*  
38 LOF lines and the IT ecotype showed similar patterns of reduced cold responsive expression  
39 compared to the SW ecotype.

40 **Conclusions:** We identified ten genes that are at least partially regulated by *CBF2* that may  
41 contribute to the differences in cold acclimated freezing tolerance between the Italian and  
42 Swedish ecotypes. These results provide novel insight into the molecular and physiological  
43 mechanisms connecting a naturally occurring sequence polymorphism to an adaptive response to  
44 freezing conditions.

45 **KEYWORDS:**

46 adaptive phenotypic plasticity, *Arabidopsis*, *CBF2*, CRISPR-Cas9, cold acclimation, freezing

47 tolerance, genotype-phenotype mapping, local adaptation, RNAseq, winter annual

## 48 INTRODUCTION

49 Local adaptation is a consequence of a species occupying heterogeneous habitats.  
50 Adaptation to local environments, particularly those where stress imposes strong selection,  
51 should involve phenotypic differentiation for ecologically important traits. Such locally adaptive  
52 traits are unlikely to be beneficial in contrasting environments (Clausen, Keck, and Hiesey,  
53 1940). More generally, fitness tradeoffs across environments are thought to drive biological  
54 diversification at multiple scales (MacArthur, 1972; Futuyma and Moreno, 1988; Whitlock,  
55 1996; Hereford, 2009). Despite many dozens of empirical studies of local adaptation (reviewed  
56 in Hereford, 2009), and a growing number of examples mapping the genetic basis of fitness in  
57 ancestral environments (Lowry et al., 2009; Hall, Lowry, and Willis, 2010; Ågren et al., 2013;  
58 Anderson et al., 2013; Leinonen et al., 2013; Postma and Ågren, 2016; Ågren et al., 2017), there  
59 are still very few cases where the traits underlying local adaptation have been identified and  
60 experimentally confirmed. Rarer still are examples of the molecular and physiological  
61 mechanisms of local adaptation (Anderson, Willis, and Mitchell-Olds, 2011; Savolainen,  
62 Lascoux, and Merilä, 2013; Tiffin and Ross-Ibarra, 2014; VanWallendael et al., 2019).  
63 Identifying the genes that underlie local adaptation is critical to resolving a longstanding debate  
64 about the genetic basis of adaptation (Fisher, 1930; Kimura, 1983; Orr, 1998, 2005; Rockman,  
65 2011; Rausher and Delph, 2015; Remington, 2015; Dittmar et al., 2016). Identifying the traits  
66 and physiological mechanisms that underlie local adaptation is a stepping stone to identifying the  
67 causal genes, and also informs our understanding of how selection has shaped differentiation in  
68 response to environmental heterogeneity.

69 One trait that is likely to have broad adaptive significance for overwintering species  
70 growing at high latitudes or altitudes is freezing tolerance. Freezing tolerance typically requires a

71 period of cold acclimation, an extended period of cold, but non-freezing temperatures  
72 (Thomashow, 1999, 2010; Preston and Sandve, 2013; Barrero-Gil and Salinas, 2018), which  
73 induces major changes in gene expression, metabolism, and physiology. Typical changes include  
74 increased production of soluble sugars and other compounds that decrease the freezing point of  
75 the cell, as well as proteins and metabolites to stabilize membranes, reduce or resist ice re-  
76 crystallization in extracellular spaces, and resist desiccation (Thomashow, 1999, 2010; Preston  
77 and Sandve, 2013; Barrero-Gil and Salinas, 2018; Zuther et al., 2018). Thus, cold acclimated  
78 freezing tolerance is an example of adaptive phenotypic plasticity, in which cold temperatures  
79 trigger an inducible, adaptive physiological mechanism to reduce the stress of freezing  
80 temperatures.

81 Induced responses to stress are thought to reflect adaptations where the mechanism is  
82 costly (Agrawal, 2011; Karban, 2011), and where organisms experience stressful environments  
83 at different periods in their life history. In this scenario, plants should deploy costly mechanisms  
84 of stress tolerance only when the stress is eminent. Unlike induced responses to stress where the  
85 cue is closely physically and temporally associated with the agent of selection, such as the  
86 induced resistance to herbivores (Agrawal, 2011; Karban, 2011), the cues and the agents of stress  
87 in cold acclimated freezing tolerance are temporally separated. In many temperate regions, the  
88 conditions that trigger cold acclimation occur far earlier in the life cycle than hard freezing  
89 events. The decoupling of cue from the agent of stress in cold acclimation leads to an even  
90 greater potential for plants to incur costs. For example, populations in lower latitudes and/or  
91 altitudes in the temperate zone are routinely exposed to temperatures that could induce  
92 acclimation, yet plants in those environments may never experience severe freezing  
93 temperatures. This leads to the hypothesis that response to acclimation cues may be adaptive in

94 some geographic regions where freezing is prevalent and severe, but could result in negative  
95 fitness consequences in warmer regions.

96 Connecting the causal chain between sequence polymorphism, molecular phenotypes,  
97 organismal phenotypes, and ultimately fitness in contrasting environments is not an easy task. It  
98 is well beyond the scope of any individual study to provide all the necessary information.  
99 Detailed studies of the molecular and physiological mechanisms of adaptive traits in study  
100 systems for which local adaptation has already been demonstrated in field experiments therefore  
101 represent one clear path toward linking sequence polymorphism to ecologically relevant traits  
102 and ultimately to fitness. Indeed, in their recent review on stress response networks in plant local  
103 adaptation, VanWallendael et al. (2019) highlight that "integrating field-based studies of local  
104 adaptation with mechanistic physiological and molecular biology promises advances in multiple  
105 areas of plant science."

106 Differences in freezing tolerance in locally adapted (Ågren and Schemske, 2012; Ågren  
107 et al., 2013; Oakley et al., 2014) ecotypes of *Arabidopsis thaliana* (hereafter *Arabidopsis*) from  
108 Sweden (SW) and Italy (IT) represent one such opportunity to uncover the genetic and  
109 physiological mechanisms of plant interactions with a stressful environment in the context of  
110 local adaptation. Eight years of field experiments have mapped quantitative trait loci (QTL) for  
111 local adaptation (Ågren et al., 2013; Postma and Ågren, 2016; Oakley and Ågren, unpublished  
112 data). Field and laboratory studies have identified freezing as a major selective agent in SW  
113 (Ågren and Schemske, 2012; Ågren et al., 2013; Oakley et al., 2014) and a laboratory study has  
114 identified large effect freezing tolerance QTL in the same genomic regions as QTL for local  
115 adaptation and fitness tradeoffs (Oakley et al., 2014).

116           The gene underlying the largest effect freezing tolerance QTL has been identified as  
117 encoding the transcription factor *CBF2* (Gehan et al., 2015), and this has been functionally  
118 validated using electrolyte leakage freezing tolerance assays on both transgenic and CRISPR  
119 mutant lines (Gehan et al., 2015; Park et al., 2018). *CBF2* is well known to be a major regulator  
120 of freezing tolerance in both the common laboratory line Col-0, and in natural accessions of  
121 *Arabidopsis* (Thomashow, 1999; Alonso-Blanco et al., 2005; Thomashow, 2010; Park et al.,  
122 2015; Barrero-Gil and Salinas, 2018), and the IT allele for *CBF2* contains a deletion resulting in  
123 a loss of function (Gehan et al., 2015). The CBF genes generally, and *CBF2* in particular, have  
124 been shown to mediate large scale changes in gene expression in response to even short-term  
125 cold acclimation (Hannah et al., 2006; Gehan et al., 2015; Park et al., 2015; Jia et al., 2016; Zhao  
126 et al., 2016; Shi et al., 2017; Park et al., 2018). *CBF2* is therefore a key regulator of adaptive  
127 phenotypic plasticity in the SW ecotype of *Arabidopsis* discussed above, and potentially for  
128 other winter annuals from freezing climates.

129           In this study we investigate the molecular mechanisms that underlie the differences in  
130 *CBF2* mediated cold acclimated freezing tolerance between our SW and IT ecotypes using a  
131 growth chamber freezing assay and RNAseq. We specifically address the effects of the naturally  
132 occurring loss of function mutation in *CBF2* in IT by examining gene expression and freezing  
133 tolerance of two independent loss of function mutations (produced using CRISPR-Cas9) in the  
134 SW genetic background, as well as two near isogenic lines (NILs) where we have introgressed a  
135 small part of the Italian genome surrounding *CBF2* into the SW genetic background. We ask the  
136 following questions: 1) What proportion of the difference in freezing tolerance between the SW  
137 and IT ecotypes can be explained by a *CBF2* loss of function mutation? 2) Do differences in cold

138 responsive gene expression due to the *CBF2* loss of function mutation explain differences in  
139 freezing tolerance between the SW and IT ecotypes?

140

## 141 **MATERIALS AND METHODS**

### 142 **Study system—**

143 *Arabidopsis thaliana* is a small selfing (Abbott and Gomes, 1989) annual with a wide native  
144 range in Europe, Asia, and Africa (Koornneef, Alonso-Blanco, and Vreugdenhil, 2004; Beck,  
145 Schmuths, and Schaal, 2008; Durvasula et al., 2017), where many populations exhibit a winter  
146 annual life history (Montesinos et al., 2009; Ågren and Schemske, 2012; Burghardt, Edwards,  
147 and Donohue, 2016). In SW, seeds germinate in August and September and seedlings experience  
148 low temperatures in the autumn before overwintering as rosettes. In winter in SW, soil  
149 temperatures are below freezing for more than 80 days and commonly reach -6°C (Oakley et al.,  
150 2014). In IT, seeds germinate in October and November and plants experience cold but non-  
151 freezing temperatures throughout the winter as rosettes. Thus, both populations experience  
152 temperatures that trigger cold acclimation, but only SW experiences freezing events.

### 153 **CRISPR and NIL construction—**

154 In order to mimic the loss-of-function mutation in *CBF2* found in IT, we utilized the  
155 CRISPR/Cas9 system to generate two independent loss of function *CBF2* mutant lines in the SW  
156 genetic background. We followed a multigenerational approach to create the CRISPR lines  
157 (Feng et al., 2014). Briefly, the 19 bp oligonucleotides designed to target the coding region of  
158 *CBF2* under control of AtU6 promoter were cloned to a single binary vector (pCambia1300):  
159 *CBF2*, 5'- TCGCCGCCATAGCTCTCCG-3'. Seeds generated after floral dip were exposed to  
160 antibiotic media to select the first generation of transformed seeds (T1), which were sequenced



161 to confirm the *CBF2* mutation. Transgenic plants with the *CBF2* mutation were self-pollinated  
162 for two generations to obtain T3 lines homozygous for the *CBF2* loss-of-function mutations. The  
163 T3 lines were then backcrossed to SW in order to remove any possible insertional effects by the  
164 T-DNA containing the CRISPR/Cas9 transgene. Two lines were produced (Fig. S1); SW:cbf2 a,  
165 which is the same line with a 19 bp deletion in the coding region of *CBF2* in Park et al. (2018),  
166 and SW:cbf2 b, with a 13 bp deletion in the coding region of *CBF2*.

167 We also produced two independent NILs for the *CBF2* region by crossing recombinant  
168 inbred lines with IT introgression segments spanning *CBF2* to the SW parental line. The  
169 backcrossed lines were then selfed for several generations, and lines of interest were genotyped  
170 using a combination of 2b-RAD (Wang et al., 2012) and PCR-based genotyping strategies. Two  
171 NILs were ultimately generated and used in experiments: NIL R37, which has a 2.4 Mb  
172 introgression segment around the gene *CBF2*, and NIL R38, which has a 6.8 Mb introgression  
173 segment that includes *CBF2*. Our use of both CRISPR and NILs in this experiment was  
174 motivated by a desire to link these results with field-based estimates of survival and reproduction  
175 for plants with functional and non-functional *CBF2* alleles. Due to European Union regulations,  
176 lines generated by CRISPR-Cas9 cannot be planted at native field sites, necessitating the use of  
177 NILs for the field studies. The inclusion of NILs in addition to the CRISPR lines here allows us  
178 to compare the effects of the native LOF allele with those of experimental mutations. Having  
179 replicate lines of both types dramatically increases our confidence that the effects we observe in  
180 the CRISPR mutants are due to the loss of function of *CBF2* and not to off-target genes.

#### 181 **Freezing assay—**

182 To quantify the effect of the loss-of-function mutation in *CBF2* we exposed seedlings from 6  
183 different lines (IT, SW, the two SW background NILs, and two SW background CRISPRs *CBF2*

184 LOF lines) to a growth chamber freezing assay in which seedlings experienced a period of cold  
185 acclimation followed by freezing conditions. The experimental conditions were based on field  
186 data, and both this data and protocol have been described previously (Oakley et al., 2014). The  
187 experiment was randomized in a stratified fashion in a complete block design. Each block  
188 consisted of 2 quartered petri dishes (containing 8 cells), 12 individual seeds of each line were  
189 sown in one cell. There were 60 blocks in total, divided evenly among 10 trays (to facilitate  
190 randomization within the growth chamber). This entire experimental design was repeated three  
191 times, with each temporally separated growth chamber experiment referred to as a batch.

192         The freezing assay protocol follows Oakley et al. (2014). Briefly, seeds were sterilized  
193 using a 30% bleach and TWEEN 20 solution (Sigma Aldrich, St. Louis, Missouri, USA) for 10  
194 minutes and suspended in 0.1% Phytoblend agar (Caisson Laboratories, Inc., Smithfield, Utah,  
195 USA) overnight in the dark at 4°C prior to sowing. All seeds were sown on autoclaved  
196 Gamborg's B-5 Basal Salts (without sucrose) and Phytoblend agar (Caisson Laboratories, Inc.,  
197 Smithfield, Utah, USA) and poured into sterilized petri dishes. The petri dishes were cold  
198 stratified in the dark at 4°C for five days to synchronize germination. This was followed by  
199 germination and early growth for eight days in a growth chamber at 22°C, 16-hour day length  
200 (16L:8D) with a photosynthetically active radiation (PAR) of 125  $\mu\text{mol photons m}^{-2} \text{s}^{-1}$ . After  
201 this period, we put lids on the trays to reduce drying of the agar media and moved the trays to a  
202 chamber capable of freezing temperatures to initiate the 10 days cold acclimation phase (4°C,  
203 10L:14D, 50 PAR). We next reduced the temperature to -2°C for 24 hours, and added shaved ice  
204 to each cell to facilitate ice nucleation (Smallwood and Bowles, 2002). The chamber then went  
205 into freezing at -7 °C for a total of 8 days. During this freezing period the petri dishes were kept  
206 in the dark to minimize confounding effects of temperature and photoperiod. To mitigate

207 temperature variation within the chamber, we used supplemental fans and rotated trays twice a  
208 day. After the freezing period, we brought the chamber up to 4°C for 24 hours to gradually thaw  
209 the plants, followed by 48 hours at 22°C.

210 We quantified freezing tolerance per cell as mean percent survival after the freezing  
211 period. Some cells were not included in the freezing tolerance assay because the plants were  
212 sacrificed to collect RNA samples (see below). We excluded seedlings that did not develop true  
213 leaves, as preliminary results indicated that seedlings of this size are not freezing tolerant  
214 regardless of genotype. Of the total 942 cells included in the freezing assay, we excluded 97 cells  
215 because they contained fewer than 4 individual plants of sufficient size to collect freezing  
216 tolerance data. In the final dataset, freezing tolerance was estimated for an average of 140.8 cells  
217 per line (range = 122-158), each containing an average of 8.26 individual plants — a grand total  
218 of 7005 individuals.

219 Freezing tolerance was analyzed with an analysis of variance with line as a fixed effect.  
220 Because of the limited number of batches (3), this factor was treated as a fixed effect. Block  
221 nested within batch was treated as a random effect, and significance was tested with a likelihood  
222 ratio test. With the exception of IT, which had about five-fold more cell mean freezing tolerance  
223 values of zero than the other lines (Fig. S2), the residuals of this model were approximately  
224 normally distributed with minimal heteroscedasticity. Reanalysis of a model excluding IT  
225 yielded qualitatively similar results for the overall effect of line and the pairwise contrasts to SW  
226 (not shown), so we proceed with the full model. Because we are primarily interested in the  
227 reduction in freezing tolerance resulting from a non-functional *CBF2* allele, we limited pairwise  
228 comparisons to those involving the SW ecotype, and tested these with a-priori linear contrasts.  
229 All statistics were performed in JMP v. 13 (JMP, 1989-2019).

230 **RNA extraction—**

231 We randomly selected six blocks in the first batch to be completely harvested for RNA  
232 sequencing and these blocks were excluded from the freezing tolerance assay. We harvested all  
233 available plant tissue (roots and leaves), four hours after the lights came on in order to minimize  
234 the effects of circadian rhythm (Dong, Farre, and Thomashow, 2011). We used RNeasy Plant  
235 Mini Kit (Qiagen, Hilden, Germany) for RNA extraction using three replicates of each line at  
236 both pre-acclimation (22°C) and post-acclimation (4°C for 10 days) conditions. Total RNA was  
237 quantified and checked for quality using a Qubit Fluorometer (Life Technologies Holdings PTE.  
238 Ltd., Singapore, Singapore) and a 2100 Bioanalyzer (Agilent Technologies Inc., Santa Clara,  
239 California, USA) at the RTSF Genomics Core at Michigan State University.

240 **Sequencing—**

241 Samples were prepared using the Illumina TruSeq Stranded mRNA Library preparation kit  
242 (Illumina Inc., San Diego, California, USA) on a Perkin Elmer Sciclone NGS (Perkin Elmer,  
243 Inc., Waltham Massachusetts, USA). Completed libraries were quality checked and quantified  
244 using a combination of Qubit dsDNA HS (Life Technologies Holdings PTE. Ltd., Singapore,  
245 Singapore) and Caliper LabChipGX HS DNA (Perkin Elmer, Inc., Waltham Massachusetts,  
246 USA) assays. Libraries were pooled for multiplexed sequencing. Sequencing was carried out in a  
247 1x50bp single end format using Illumina HiSeq 4000 SBS reagents (Illumina Inc., San Diego,  
248 California, USA). Base calling was done by Illumina Real Time Analysis (RTA) v2.7.6 and  
249 output of RTA was demultiplexed and converted to FastQ format with Illumina Bcl2fastq  
250 v2.18.0.

251 **RNAseq analyses —**

252 *Quality control and mapping—*

253 Remaining adapter sequences were removed, bases with quality scores less than 5 were trimmed,  
254 and reads smaller than 33bp were excluded using cutadapt v. 1.8.1 (Martin, 2011). Quality of the  
255 remaining reads was inspected using FastQC (Andrews, 2010). RNAseq reads from the different  
256 genotypes were mapped to the *Arabidopsis thaliana* reference genome (TAIR10) using Tophat  
257 version 1.4.1 (Trapnell et al., 2012). TopHat was run in default mode with the following  
258 exceptions: the minimum and maximum intron lengths were set to 10 and 15,000 bp,  
259 respectively. A GTF file (TAIR10) was used to assist in the mapping of known junctions. Read  
260 counts for each gene were obtained using HTSeq 0.6.1 (EMBL, Heidelberg, Germany) using the  
261 intersection-noempty option to only include counts for reads mapping to one unique gene.

#### 262 *Differential gene expression—*

263 Differential expression analysis was implemented in R version 3.0.1 (R, 2011) with the edgeR  
264 package v. 3.22.3 (Robinson, McCarthy, and Smyth, 2010). Because estimates of differential  
265 gene expression can be inflated by weakly expressed genes, we included only genes with more  
266 than one read per million (>1 CPM) in at least two samples. We used the trimmed mean of M-  
267 values (TMM) as our normalization method (Robinson, McCarthy, and Smyth, 2010).

268 Ultimately, we were interested in differential gene expression as an interaction between  
269 *CBF2* alleles and the cold acclimation treatment, and the extent to which loss of function  
270 mutations in *CBF2* can explain differential expression between IT and SW in response to cold  
271 acclimation. The one thing in common among the IT ecotype and the four total CRISPR and NIL  
272 lines (in a SW background) is a non-functional *CBF2* allele. We therefore used 5 separate  
273 generalized linear models to test for an interaction between genotype and the cold acclimation  
274 treatment. SW was included in all five comparisons, and the SW vs. IT comparison  
275 establishes ecotypic differences in cold responsive gene expression. Each of the SW vs.

276 CRISPR/NIL comparisons is a measure of the effect of a loss of function mutation in *CBF2*  
277 on cold responsive gene expression. Because we have multiple independent comparisons,  
278 which is in and of itself an approach to reducing false positives, we took a modified approach  
279 to adjusting  $P$  values for multiple comparisons in order to minimize false negatives. First, we  
280 consider only genes where there was a significant (at a Benjamini-Hochberg FDR corrected  $P$   
281 value, hereafter  $P_{FDR, \leq 0.05}$ ) interaction between genotype and cold acclimation treatment in  
282 the SW vs. IT comparison. Then for each of four additional comparisons, we considered only  
283 genes that were identified in the comparison between SW and IT (above), and those that had a  
284 significant genotype by treatment interaction in their respective pairwise comparison to SW at  
285 an uncorrected  $P$  value of  $< 0.05$ . We examined the subset of genes with significant effects of  
286 the genotype by cold treatment interaction for expression for all five pairwise comparisons of  
287 SW vs. IT, CRISPR, or NIL. These genes were considered to be candidates for downstream  
288 targets of *CBF2* that are important in differences in cold acclimated freezing tolerance between  
289 SW and IT.

290 We used RT-qPCR to confirm the results of our RNAseq experiment for two genes that  
291 exhibited significant genotype by cold acclimation treatment interactions. RNA was extracted as  
292 described above, and RT-qPCR was performed using the Luna Universal Onestep RT-qPCR kit  
293 (New England Biolabs, Ipswich, Massachusetts, USA) on a Bio-Rad CFX Connect Real-Time  
294 PCR Detection System (Bio-Rad Laboratories Inc., Hercules, California, USA). The threshold  
295 quantification cycle (Cq) was determined using Bio-Rad CFX Manager version 3.1. Relative  
296 expression ratios were quantified based on the corresponding efficiency of the primers for each  
297 gene and the deviation of Cq values for each sample from the mean Cq values of the pre-  
298 acclimation samples for each gene (Pfaffl, 2001), in relation to the housekeeping gene *ACT2*.

299 *Gene ontology* —

300 To assess the function of genes that exhibited significant genotype by environment interactions  
301 in the SW vs. IT comparison, we performed a gene ontology (GO) enrichment analysis using the  
302 PANTHER v. 14 overrepresentation test, performed with the GO biological processes complete  
303 annotations for the complete *Arabidopsis thaliana* gene database (Mi et al., 2019). Fisher exact  
304 tests were used to estimate the GO term enrichment  $P$  values, and a false discovery rate  
305 adjustment of  $P$  values was calculated to correct for the large number of comparisons.

306

## 307 **RESULTS**

308 **Freezing assay**—

309 Overall freezing tolerance for the 845 cells (see materials and methods) was 50.2% (SD =  
310 34.5%), and ranged from 0% to 100%. Genotype had a highly significant effect on freezing  
311 tolerance ( $F_{5,689} = 109.5$ ,  $P < 0.001$ ). This strong signal of genetic-based differences in freezing  
312 tolerance accounted for significant variation among batches ( $F_{2,156} = 32.5$ ,  $P < 0.001$ ), and  
313 significant variation among blocks nested within batch ( $X^2 = 124.8$ ,  $df=1$ ,  $P < 0.001$ ). Least  
314 square mean freezing tolerance for SW was 71.9%, which was significantly greater than that of  
315 IT of 11.4% (Table 1, Fig. 1). These differences in freezing tolerance between SW and IT are  
316 similar to differences in overwinter survival at the Swedish site in cold years (Ågren and  
317 Schemske, 2012; Oakley et al., 2014), so differences reported here are reflective of differences in  
318 a key fitness component observed in nature. All four lines with a non-functional *CBF2* in the  
319 Swedish genetic background had significantly and substantially reduced freezing tolerance  
320 compared to SW (Table 1, Fig. 1). Absolute reductions in mean freezing tolerance compared to  
321 SW for these 4 lines ranged from 13.11% to 25.74%, explaining from 21.67% to 42.54% of the

322 difference between SW and IT in mean freezing tolerance (Table 1, Fig. 1). Much of the  
323 variation among these 4 lines is attributable to the somewhat higher freezing tolerance of NIL  
324 R37 compared to the other 3 lines (Table 1, Fig. 1).

### 325 **Gene expression** —

#### 326 *Differences between SW and IT—*

327 There were 249 genes that were differentially cold responsive between SW and IT (genotype by  
328 treatment interaction) at  $P_{FDR} \leq 0.05$  (Fig. S3; Table S1). These genes are involved in genetic  
329 pathways involved in glucosinolate biosynthetic processes (6/42 annotated GO terms,  $P_{FDR} =$   
330 0.00977), response to gibberellin (8/143,  $P_{FDR} = 0.0315$ ), alpha-amino acid biosynthetic  
331 processes (9/180,  $P_{FDR} = 0.03$ ), response to water deprivation (14/346,  $P_{FDR} = 0.00665$ ), among  
332 others (Table S2).

#### 333 *Role of CBF2—*

334 Expression of *CBF2* in the warm treatment was very low (less than 0.3 CPM) for all lines, and  
335 high for all lines after cold acclimation (range = 17-33 CPM). For the pairwise comparisons of  
336 SW to NIL lines, there were 36 and 43 genes for NIL R37 and NIL R38, respectively, that met  
337 the above criteria and had a significant genotype by cold acclimation treatment interaction at an  
338 uncorrected  $P < 0.05$  (Fig. S4, Tables S3 and S4). There were 21 genes meeting both criteria in  
339 common between both NILs. For the pairwise comparisons of SW to CRISPR lines, there were  
340 38 and 29 genes for SW:cbf2 a and SW:cbf2 b respectively that met both criteria described  
341 above (Fig. S4, Tables S5 and S6). There were 17 genes meeting both criteria in common  
342 between both CRISPR lines. There were only 10 cold responsive genes meeting both criteria in  
343 common among the 4 NILs and CRISPR lines (Figs 2, 3, S5, and S6).



344 To describe patterns of cold acclimated gene expression in SW, we first grouped genes  
345 into four categories based on their log<sub>2</sub> fold change (LFC) of SW cold acclimation vs. warm  
346 (LFC<sub>caSW</sub>; Eq. 1).

$$348 \quad LFC_{caSW} = \log_2 \left( \frac{SW_{cold}}{SW_{warm}} \right)$$

347 *Equation 1. Calculation of LFC<sub>caSW</sub>, the log fold change in expression of SW in response to cold acclimation (ca).*

349

350 Then, we quantified the difference in cold responsiveness between IT and SW (LFC<sub>caSW</sub> vs.  
351 LFC<sub>caIT</sub>; Eq. 2).

$$352 \quad LFC_{caSW} - LFC_{caIT} = \log_2 \left( \frac{SW_{cold}}{SW_{warm}} \right) - \log_2 \left( \frac{IT_{cold}}{IT_{warm}} \right)$$

353 *Equation 2. Calculation of the difference in cold responsiveness between SW and IT.*

354

355 For each of the 4 CRISPR and NIL lines, we calculated the difference in cold responsiveness  
356 using Equation 2 substituting the line of interest for IT. Finally, we calculated the average  
357 (among the 4 *CBF2* LOF lines in a SW background) proportion of the difference in cold  
358 responsiveness between SW and IT (Eq. 2) that can be explained by *CBF2* (Table 2). In other  
359 words, we categorized genes first based on how cold responsive they are in SW, then we  
360 quantified how much of the difference in cold responsiveness between SW and IT can be  
361 explained by LOF mutations in *CBF2*.

362 The first category represents genes that are very highly cold responsive (in terms of log  
363 fold change in response to cold) in SW (Figs 2 and S5). We found two genes in this category,  
364 *Gols3* (LFC<sub>caSW</sub> = 6.36) and AT4G30830 (LFC<sub>caSW</sub> = 4.15). *Gols3* exhibited a striking pattern of  
365 cold acclimated gene expression where all 4 lines with LOF mutations in *CBF2* had nearly  
366 identical patterns of expression to IT (explaining on average 85% of the log fold difference in

367 cold responsiveness between SW and IT), suggesting that *CBF2* almost completely mediates the  
368 difference between SW and IT in cold acclimated gene expression of *Gols3*. For AT4G30830,  
369 *CBF2* could explain on average 43% of the log fold difference between SW and IT. The relative  
370 expression patterns that we observed using RT-qPCR for *Gols3* were consistent with the results  
371 we obtained using RNAseq (Fig. S7).

372 The second category represents highly cold responsive genes ( $LFC_{caSW}$  between 1.91 and  
373 2.70) in SW, and included six genes *LEA14*, *CCT2*, *COR-413PM1*, *ERD10*, *COR47*, and *ERD7*  
374 (Figs 3 and S5). Among these, *CBF2* explained the greatest difference in log fold cold  
375 responsive gene expression between SW and IT for *LEA14* (80%) and *CCT2* (60%), with lower  
376 values for *COR-413PM1* (52%), *ERD10* (48%), and even lower values for *COR47* (35%), and  
377 *ERD7* (33%). Some of these genes are therefore predominantly regulated by *CBF2*, whereas for  
378 others, *CBF2* plays an important, but not predominant role in regulation. The relative expression  
379 patterns that we observed using RT-qPCR for *COR413-PM1* were consistent with the results we  
380 obtained using RNAseq (Fig. S7).

381 The final two categories of genes are those that are modestly (*AT3G55760*,  $LFC_{caSW} =$   
382 1.18) or weakly (*DEAR3*,  $LFC_{caSW} = 0.43$ ) cold responsive in SW (Figs S5 and S6). Despite the  
383 limited cold responsiveness of these genes in SW, *CBF2* could explain a large proportion of  
384 differential log fold cold responsiveness between SW and IT, 64% and 82% respectively for  
385 *AT3G55760* and *DEAR3*.

386

## 387 **DISCUSSION**

388 Approximately 2/3 of land on earth experiences freezing temperatures at least occasionally  
389 during a given year (Larcher, 1980). Freezing tolerance is therefore likely to be a key adaptation

390 to stressful environments for many plants, and because freezing tolerance requires cold  
391 acclimation (Thomashow, 1999, 2010; Preston and Sandve, 2013; Barrero-Gil and Salinas,  
392 2018), it is likely to represent adaptive phenotypic plasticity. We investigated the potential  
393 genetic and physiological mechanisms of differences in *CBF2* mediated cold acclimated freezing  
394 tolerance between locally adapted ecotypes SW and IT. We used CRISPR mutants that mimic a  
395 naturally occurring loss of function mutation in *CBF2*, as well as NILs that contain the natural  
396 loss of function allele from IT introgressed into an otherwise SW genetic background. For each  
397 of these lines we quantified freezing tolerance in a growth chamber experiment, and additionally  
398 quantified gene expression before and after cold acclimation. We found that this single mutation  
399 in *CBF2* underlies differences in adaptive phenotypic plasticity in the form of cold acclimation  
400 between SW and IT, explaining 1/3 of the substantial differential survival through survival  
401 between SW and IT. Our approach to identifying the genes that underlie cold acclimated freezing  
402 tolerance involved four independent genetic lines, and explicitly tested genotype by treatment  
403 interactions for differential gene expression. We were thus able to identify a remarkably short list  
404 of ten candidate genes that may play an important role in this adaptive, phenotypically plastic  
405 response. Future studies will investigate the contribution of these candidates to local adaptation  
406 and fitness tradeoffs using growth chamber and field experiments with NILs that have pairwise  
407 combinations of introgressions of *CBF2* and target genes.

#### 408 **Freezing tolerance** —

409 Consistent with previous studies, we find large differences in freezing tolerance between SW and  
410 IT. Additionally, the freezing tolerance estimates of the CRISPR and NI lines provide direct  
411 evidence for the effect of the naturally occurring LOF mutation in the IT allele of *CBF2* on  
412 freezing tolerance. Cold acclimated freezing tolerance of SW was approximately 6.5 fold greater

413 than that of IT (71 vs. 11%, respectively), and these estimates correspond closely to a previous  
414 study mapping QTL for freezing tolerance using the same experimental assay (Oakley et al.,  
415 2014), and to differences in overwinter survival in the field (Ågren et al., 2013; Oakley et al.,  
416 2014). On average, a LOF mutation in *CBF2* in a SW background resulted in a reduction in  
417 freezing tolerance of about 20% (Fig. 1) and could explain about 33% of the difference in  
418 freezing tolerance between SW and IT. The absolute effect size of 20% observed here is  
419 somewhat lower than the 25% estimated for a QTL containing *CBF2* (Oakley et al., 2014), but  
420 the percent difference between SW and IT is similar to the 36% from the previous study. The  
421 somewhat higher freezing tolerance values for one of the NILs (59% in NIL R37 compared to  
422 50% in NIL R38) is difficult to explain, but the overall pattern for this line follows the expected  
423 direction.

424 Our results add to a growing body of literature pointing to the role of *CBF2* in regulating  
425 freezing tolerance, and lays the groundwork for linking the action of *CBF2* with local adaption  
426 and fitness tradeoffs across environments. Alonso Blanco *et al.* (2005) were the first to identify  
427 and functionally validate the role of a naturally occurring LOF mutation in *CBF2* in cold  
428 acclimated freezing tolerance. They identified a large effect QTL for freezing tolerance in a cross  
429 between laboratory strain (Ler) and an accession from the Cape Verde Islands (Cvi) that was  
430 attributable to a deletion in the *CBF2* allele of Cvi, and confirmed this as the causal variant using  
431 transgenic lines in a freezing tolerance assay. In investigating natural variation in freezing  
432 tolerance along an elevational gradient in China, Kang *et al.* (2013) also found a mutation in  
433 *CBF2* alleles from lower elevation populations that would be predicted to result in LOF. Park et  
434 al. (2018) made CRISPR *CBF2* LOF lines in SW, and demonstrated that a LOF mutation in  
435 *CBF2* results in increased electrolyte leakage in leaves after freezing. Our work builds upon that

436 of Park et al. (2018) in having an additional independent *CBF2* LOF line, as well as two NILs  
437 that can be used directly in future field experiments. Because European Union regulations  
438 prevent the planting of lines that carry CRISPR-Cas9 mutations in the field, the only option for  
439 connecting patterns of sequence polymorphism to phenotypes to fitness in these contrasting  
440 native environments is to combine growth chamber experiments using CRISPR lines and NILs  
441 with field experiments using NILs. Furthermore, by quantifying freezing tolerance as survival  
442 through freezing, we are able to link this work to extensive long-term field study of the genetic  
443 basis of local adaptation in this system.

444         The discovery of presumably functional variation in CBF genes only in warmer climates  
445 (Zhen and Ungerer, 2008; Monroe et al., 2016) is consistent with the idea that cold acclimation is  
446 costly in cold, non-freezing environments. Additional indirect support for fitness costs of cold  
447 acclimation comes from demonstrations of fitness costs after overexpression of CBF genes  
448 (Jackson et al., 2004; Zhen, Dhakal, and Ungerer, 2011). It thus appears that selection on cold  
449 acclimation is not merely relaxed in warmer climates (c.f. Zhen and Ungerer, 2008), but rather  
450 that the direction of selection changes across environments, such that cold acclimation is favored  
451 in some climates and selected against in others. While one direct test of the costs of cold  
452 acclimation did not find evidence for such costs (Zhen, Dhakal, and Ungerer, 2011), the short  
453 acclimation period used in this experiment may not have been sufficient to induce the full costs  
454 of acclimation that might accumulate over long periods in nature. Another confounding factor is  
455 that genotypes that have cold acclimated freezing tolerance are also likely to accelerate flowering  
456 in response to cold acclimation conditions because these conditions are similar to those  
457 promoting vernalization (Preston and Sandve, 2013). The potential confounding effects of  
458 vernalization need to be explicitly addressed in future studies on the costs of cold acclimation.

459 We therefore feel that it is premature to conclude, as do VanWallendael et al. (2019), that cold  
460 acclimation is cost free in *Arabidopsis*. Our present experiment cannot resolve this question, but  
461 fitness data from reciprocal transplant experiments with NILs in SW and IT will directly test the  
462 hypothesis of the costs of cold acclimation. In addition, fitness data from growth chamber  
463 experiments using CRISPR lines and NILS combined with RNAseq and metabolomic data will  
464 allow us to determine the molecular mechanisms of any costs of cold acclimation.

#### 465 **Gene expression —**

##### 466 *Differences between SW and IT—*

467 We identified 249 genes with a significant genotype (SW vs. IT) by cold acclimation treatment  
468 interaction ( $P_{FDR} \leq 0.05$ ). A recent study identified 5,200 genes in the SW and IT ecotypes that  
469 were differentially expressed in response to cold (Fig. 1D; Gehan et al., 2015). These cold  
470 responsive genes include 145 of the genes from our analysis, including nine of the ten most  
471 significantly cold-responsive genes (Table S7). The 104 genes from our study that are not  
472 included in the Gehan et al. (2015) study include *DEAR3*, which exhibited slight but significant  
473 differences in cold-responsive expression in all pair-wise comparisons (See below; Table S8;  
474 Fig. S6).

##### 475 *Role of CBF2—*

476 There has been considerable recent interest in assessing the effects of loss of function CBF  
477 mutations on cold acclimated gene expression and freezing tolerance (Zhao et al., 2016; Park et  
478 al., 2018). The focus of many of these studies is on the combined effects of loss of function in all  
479 three CBF genes to determine what is referred to as the “CBF regulon” for a given accession,  
480 rather studying the effects of natural variation in individual CBF genes. Our work builds upon  
481 the recent study by Park et al. (2018), who developed CRISPR-Cas9 to mutations in CBF genes

482 in the SW genetic background, with the primary goal of examining freezing tolerance and  
483 patterns of cold-acclimated gene expression using RNAseq for a *CBF1*, 2, and 3 triple null  
484 mutant. They also reported freezing tolerance for a single *CBF2* null mutant, but did not conduct  
485 RNAseq for this line. Here we used the *CBF2* null mutant in Park et al. (2018), an additional  
486 independent *CBF2* null mutant, as well as two NILs with IT LOF mutations in a SW genetic  
487 background to hone in on the downstream targets of CBF2 that are in part responsible for  
488 differences in cold acclimated freezing tolerance, between IT and SW.

489 Examining the subset of genes with genotype by cold acclimation treatment interactions  
490 for all four lines with LOF mutations in *CBF2* in a SW background narrowed the list of  
491 differences between SW and IT to just ten genes. Because these genes were identified as  
492 significant in all five comparisons of our independent LOF lines (IT, NILs, and CRISPR lines) to  
493 SW, we have confidence that these are important candidate genes for cold-acclimated freezing  
494 tolerance mediated by *CBF2*. These genes, while not completely regulated by *CBF2*, are likely  
495 responsible for most of the differences in freezing tolerance between SW and IT caused by the  
496 LOF mutation in the IT *CBF2* allele, and thus are also candidates for mediating the fitness costs  
497 of cold acclimation in the Italian environment. The ten genes had annotations with significantly  
498 enriched gene ontology terms such as response to abiotic stimulus (GO:0009628), response to  
499 stress (GO:0006950), and response to water (GO:0009415; Table S2). We categorize these ten  
500 genes based on how cold responsive they are in SW, and further by how much of the difference  
501 in cold responsive gene expression between SW and IT can be explained by *CBF2*.

502 Two of the ten candidates were very highly cold responsive in SW, *Gols3* and  
503 AT4G30830. Perhaps the strongest candidate was Galactinol synthase 3 (*Gols3*), which was the  
504 most cold responsive gene in SW (Table 2), and for which *CBF2* could explain almost all of the

505 differences in expression between SW and IT. *Gols3* plays a key role in the raffinose  
506 biosynthesis pathway, and raffinose is associated with increased tolerance to freezing and other  
507 stresses (Taji et al., 2002). *Gols3* has been shown to be cold responsive in a number of studies  
508 (Maruyama et al., 2009; Kang et al., 2013; Park et al., 2015; Jia et al., 2016; Zhao et al., 2016),  
509 including those using the SW and IT ecotypes (Gehan et al., 2015; Park et al., 2018).  
510 Interestingly two studies with triple null mutants of the CBF genes in different genetic  
511 backgrounds, Col (Zhao et al., 2016) and SW (Park et al., 2018) both show that the three CBF  
512 genes are almost completely responsible for cold acclimated regulation of *Gols3*. Our finding  
513 here suggests that *CBF2* explains almost all of the difference between SW and IT in cold  
514 responsive gene expression of *Gols3*. Based on our results combined with those of previous  
515 studies (Park et al., 2015; Zhao et al., 2016; Park et al., 2018), we therefore conclude that *CBF1*  
516 and *CBF3* together regulate the cold responsiveness of *Gols3* that SW and IT have in common.  
517       The other very highly cold responsive gene in SW was AT4G30830, but the expression  
518 differences between SW and IT explained by *CBF2* for this gene were more modest (~40%).  
519 AT4G30830 is a Myosin-like protein of unknown function (Krishnakumar et al., 2014). This  
520 gene has been described as cold responsive in other studies (Gehan et al., 2015; Park et al.,  
521 2018). Expression of this gene showed a response similar to *Gols3* in the triple CBF null mutant  
522 (Park et al., 2018) suggesting that it is regulated primarily by the CBF genes. Our results taken  
523 together with this previous work lead us to conclude that in SW and IT, *CBF1* and *CBF3* may  
524 explain the remaining variation in expression differences between SW and IT for AT4G30830.  
525 Future studies to identify what, if any, role this gene plays in cold acclimated freezing tolerance  
526 would be worthwhile.



527           The next category of candidates included six genes that were all highly cold responsive in  
528 SW: *LEA14*, *CCT2*, *COR413-PMI*, *ERD10*, *COR47*, and *ERD7*. Of these genes, *Gols3*, *ERD10*,  
529 *COR413-PMI*, *CCT2*, and AT4G30830 were previously identified as part of the CBF regulon for  
530 SW (Park et al., 2018), and the remaining genes have been identified in regulons in other genetic  
531 backgrounds (Table S9). The amount of the difference in cold responsive gene expression  
532 between SW and IT explained by *CBF2* was variable among this category of genes: *LEA14*  
533 (~80%), *CCT2* (~60%), *COR413-PMI* and *ERD10* (~50%), and *COR47* and *ERD7* (~35%).  
534 *LEA14* is a Late Embryogenesis Abundant Protein, and is associated with cellular stress,  
535 particularly desiccation (Singh et al., 2005). *CCT2* is a phosphorylcholine cytidyltransferase,  
536 which acts to increase cellular phosphorylcholine content, an important component of biological  
537 membranes, in response to cold (Inatsugi et al., 2009). *COR413-PM1* is a multispinning  
538 transmembrane protein localized to the plasma membrane that is correlated with freezing  
539 tolerance in *Arabidopsis* and cereal crops (Breton et al., 2003), and may play a role in  
540 maintaining membrane fluidity under cold temperatures (Su et al., 2018). *ERD10* and *COR47* are  
541 both dehydrin family proteins, thought to play an important role in cellular desiccation  
542 resistance, and both have been shown to increase freezing tolerance (Puhakainen et al., 2004).  
543 *ERD7* is a drought inducible gene that has been shown to be cold responsive (Kimura et al.,  
544 2003).

545           The final two genes in our list of ten candidates were those with only modest or low cold  
546 responsiveness in SW. In spite of their relatively small responsiveness on an absolute scale,  
547 much of the differences in cold responsiveness between SW and IT for these genes could be  
548 attributed to *CBF2* (65% and 80% respectively, for AT3G55760 and DEAR3). Neither of these  
549 genes have been previously described as part of the CBF regulon for SW (Park et al., 2018), but

550 both have been identified as part of regulons from other genetic backgrounds (Table S9) .  
551 AT3G55760 is located in the chloroplast stroma and is involved in starch metabolism (Feike et  
552 al., 2016). *DEAR3* is a member of the DREB subfamily ERF/AP2 transcription factors (Sazegari,  
553 Niazi, and Ahmadi, 2015), which is the same subfamily of transcription factors as *CBF2*. As a  
554 group, the 10 candidates have likely roles in desiccation resistance, sugar biosynthesis or starch  
555 metabolism, membrane structure and transport, and regulation of transcription, while some of the  
556 functions of these genes are unknown or poorly known.

557

## 558 **CONCLUSIONS**

559 An understanding of local adaptation to stressful environments requires identifying the genetic  
560 and physiological changes that confer phenotypic variation, as well as the fitness consequences  
561 of such variation in contrasting environments. A comprehensive understanding of the genotype-  
562 phenotype-fitness map in nature is beyond the scope of any single study. Detailed molecular  
563 studies of traits that have been established as contributing to local adaptation in large multi-year  
564 field experiments is perhaps the best approach to connect sequence polymorphism to molecular  
565 and organismal phenotypes and ultimately fitness in contrasting environments. The wealth of  
566 knowledge about the genetic basis of local adaptation and adaptive traits between Swedish and  
567 Italian ecotypes of *Arabidopsis thaliana* (Ågren and Schemske, 2012; Ågren et al., 2013; Oakley  
568 et al., 2014; Postma and Ågren, 2016; Ågren et al., 2017; Oakley et al., 2018) provides an  
569 excellent foundation from which to pursue the genetic mechanisms of local adaptation. Using a  
570 novel approach of examining genotype by environment interactions in gene expression using  
571 replicate lines that either simulate (CRISPR) or contain (NILs) the LOF mutation in *CBF2* found  
572 in the IT ecotype, we narrowed the list of candidate genes for *CBF2* mediated cold acclimation

573 to just ten genes. These ten genes are excellent candidates for further study of the genetic and  
574 physiological changes that underlie the differences in freezing tolerance in these natural  
575 populations. Future studies estimating fitness for combinatorial NILs containing pairwise  
576 combinations of IT alleles of *CBF2* and each of these ten genes in growth chambers and in the  
577 field will be used to investigate interactions between *CBF2* and downstream targets. Such  
578 experiments will be coupled with metabolite analysis, particularly steps related to raffinose  
579 biosynthesis, to provide additional insight into the mechanisms underlying adaptive cold  
580 acclimation responses, and the potential for these mechanisms to result in fitness costs in  
581 alternate environments.

582

### 583 **ACKNOWLEDGEMENTS**

584 The authors would like to thank A. Babbit, J. Eilers, and M. Kargul, who helped to implement  
585 the freezing tolerance assays, and the RTSF Genomics Core at MSU for sequencing and  
586 assistance. We are grateful to Dr. Jian-Kang Zhu, Purdue University, for providing the plasmid  
587 used to generate the CRISPR lines. We thank A. Berardi, R. Deater, N. Mano, R. Watson, and  
588 members of the Zhang Lab at Purdue for assistance with qPCR. We thank members of the Aime,  
589 McAdam, McNickle, and Mickelbart labs at Purdue for helpful comments on a draft of the  
590 manuscript. Funding was provided by NSF DEB grant (1743273) to CGO, DWS, and MFT, and  
591 by AgBioResearch at Michigan State University to MFT.

592

### 593 **AUTHOR CONTRIBUTIONS**

594 C.G.O., D.W.S, and M.F.T. conceived of the study, C.G.O. and S.P. designed the experiment,  
595 S.P. and C.G.O. developed the CRISPR and NIL lines respectively, M.I.J., S.P., J.C.K, and

596 C.G.O. carried out the experiment, C.G.O., B.J.S, and S.P. analyzed the data and produced the  
597 figures, B.J.S. and C.G.O. drafted the manuscript with help from S.P. and M.I.J., and all authors  
598 contributed to revising the manuscript.

599

#### 600 **DATA ACCESSIBILITY STATEMENT**

601 Upon acceptance, all data will be deposited in the Dryad data depository and/or other appropriate  
602 publicly available data repositories.

603

604 **LITERATURE CITED**

- 605 Abbott, R. J., and M. F. Gomes. 1989. Population genetic structure and outcrossing rate of  
606 *Arabidopsis thaliana* (L.) Heynh. *Heredity* 62: 411-418.
- 607 Agrawal, A. A. 2011. Current trends in the evolutionary ecology of plant defence. *Functional*  
608 *Ecology* 25: 420-432.
- 609 Ågren, J., and D. W. Schemske. 2012. Reciprocal transplants demonstrate strong adaptive  
610 differentiation of the model organism *Arabidopsis thaliana* in its native range. *New*  
611 *Phytologist* 194: 1112-1122.
- 612 Ågren, J., C. G. Oakley, S. Lundemo, and D. W. Schemske. 2017. Adaptive divergence in  
613 flowering time among natural populations of *Arabidopsis thaliana*: estimates of selection  
614 and QTL mapping. *Evolution* 71: 550-564.
- 615 Ågren, J., C. G. Oakley, J. K. Mckay, J. T. Lovell, and D. W. Schemske. 2013. Genetic mapping  
616 of adaptation reveals fitness tradeoffs in *Arabidopsis thaliana*. *Proceedings of the*  
617 *National Academy of Sciences of the United States of America* 110: 21077-21082.
- 618 Alonso-Blanco, C., C. Gomez-Mena, F. Llorente, M. Koornneef, J. Salinas, and J. M. Martínez-  
619 Zapater. 2005. Genetic and molecular analyses of natural variation indicate *CBF2* as a  
620 candidate gene for underlying a freezing tolerance quantitative trait locus in *Arabidopsis*.  
621 *Plant Physiology* 139: 1304-1312.
- 622 Anderson, J. T., J. H. Willis, and T. Mitchell-Olds. 2011. Evolutionary genetics of plant  
623 adaptation. *Trends in Genetics* 27: 258-266.
- 624 Anderson, J. T., C.-R. Lee, C. A. Rushworth, R. I. Colautti, and T. Mitchell-Olds. 2013. Genetic  
625 trade-offs and conditional neutrality contribute to local adaptation. *Molecular Ecology*  
626 22: 699-708.

- 627 Andrews, S. 2010. FastQC: a quality control tool for high throughput sequence data. Available  
628 online at: <http://www.bioinformatics.babraham.ac.uk/projects/fastqc>.
- 629 Barrero-Gil, J., and J. Salinas. 2018. Gene regulatory networks mediating cold acclimation: the  
630 CBF pathway. In M. Iwaya-Inoue, M. Sakurai, and M. Uemura [eds.], Survival Strategies  
631 in Extreme Cold and Desiccation. Springer Singapore, Singapore.
- 632 Beck, J. B., H. Schmuths, and B. A. Schaal. 2008. Native range genetic variation in *Arabidopsis*  
633 *thaliana* is strongly geographically structured and reflects Pleistocene glacial dynamics.  
634 *Molecular Ecology* 17: 902-915.
- 635 Breton, G., J. Danyluk, J.-B. F. Charron, and F. Sarhan. 2003. Expression Profiling and  
636 Bioinformatic Analyses of a Novel Stress-Regulated Multispanning Transmembrane  
637 Protein Family from Cereals and *Arabidopsis*. *Plant Physiology* 132:  
638 <https://doi.org/10.1104/pp.1102.015255>.
- 639 Burghardt, L. T., B. R. Edwards, and K. Donohue. 2016. Multiple paths to similar germination  
640 behavior in *Arabidopsis thaliana*. *New Phytologist* 209: 1301-1312.
- 641 Chen, H. 2018. VennDiagram: Generate high-resolution Venn and Euler plots. R package  
642 version 1.6.20. Website <https://CRAN.R-project.org/package=VennDiagram>.
- 643 Clausen, J., D. D. Keck, and W. M. Hiesey. 1940. Experimental Studies on the Nature of Plant  
644 Species. I. The Effect of Varied Environments on Western North American Plants.  
645 Carnegie Institute of Washington, Washington.
- 646 Dittmar, E. L., C. G. Oakley, J. K. Conner, B. A. Gould, and D. W. Schemske. 2016. Factors  
647 influencing the effect size distribution of adaptive substitutions. *Proceedings of the Royal*  
648 *Society B-Biological Sciences* 283: 20153065.

- 649 Dong, M. A., E. M. Farre, and M. F. Thomashow. 2011. CIRCADIAN CLOCK-ASSOCIATED  
650 1 and LATE ELONGATED HYPOCOTYL regulate expression of the C-REPEAT  
651 BINDING FACTOR (CBF) pathway in *Arabidopsis*. *PNAS* 108: 7241-7246.
- 652 Durvasula, A., A. Fulgione, R. M. Gutaker, S. I. Alacakaptan, P. J. Flood, C. Neto, T.  
653 Tsuchimatsu, et al. 2017. African genomes illuminate the early history and transition to  
654 selfing in *Arabidopsis thaliana*. *Proceedings of the National Academy of Sciences, USA*  
655 114: 5213-5218.
- 656 Feike, D., D. Seung, A. Graf, S. Bischof, T. Ellick, M. Coiro, S. Soyk, et al. 2016. The Starch  
657 Granule-Associated Protein EARLY STARVATION1 Is Required for the Control of  
658 Starch Degradation in *Arabidopsis thaliana* Leaves. *The Plant Cell* 28: 1472-1489.
- 659 Feng, Z., Y. Mao, N. Xu, B. Zhang, P. Wei, D. Yang, Z. Wang, et al. 2014. Multigenerational  
660 analysis reveals the inheritance, specificity, and patterns of CRISPR/Cas-induced gene  
661 modifications in *Arabidopsis*. *PNAS* 111: 4632-4637.
- 662 Fisher, R. A. 1930. *The Genetical Theory of Natural Selection*. Oxford University Press, Oxford.
- 663 Futuyma, D. J., and G. Moreno. 1988. The evolution of ecological specialization. *Annual Review*  
664 *of Ecology and Systematics* 19: 207-233.
- 665 Gehan, M. A., S. Park, S. J. Gilmour, C. An, C. Lee, and M. F. Thomashow. 2015. Natural  
666 variation in the C-repeat binding factor cold response pathway correlates with local  
667 adaptation of *Arabidopsis* ecotypes. *The Plant Journal* 84: 682-693.
- 668 Hall, M. C., D. B. Lowry, and J. H. Willis. 2010. Is local adaptation in *Mimulus guttatus* caused  
669 by trade-offs at individual loci? *Molecular Ecology* 19: 2739-2753.
- 670 Hannah, M. A., D. Wiese, S. Freund, O. Fiehn, A. G. Heyer, and D. K. Hinch. 2006. Natural  
671 genetic variation of freezing tolerance in *Arabidopsis*. *Plant Physiology* 142: 98-112.

- 672 Hereford, J. 2009. A quantitative survey of local adaptation and fitness trade-offs. *The American*  
673 *Naturalist* 173: 579-588.
- 674 Inatsugi, R., H. Kawai, Y. Yamaoka, Y. Yu, A. Sekiguchi, M. Nakamura, and I. Nishida. 2009.  
675 Isozyme-Specific Modes of Activation of CTP:Phosphorylcholine Cytidylyltransferase in  
676 *Arabidopsis thaliana* at Low Temperature. *Plant Cell Physiology* 50: 1727-1735.
- 677 Jackson, M. W., J. R. Stinchcombe, T. M. Korves, and J. Schmitt. 2004. Costs and benefits of  
678 cold tolerance in transgenic *Arabidopsis thaliana*. *Molecular Ecology* 13: 3609-3615.
- 679 Jia, Y., Y. Ding, Y. Shi, X. Zhang, Z. Gong, and S. Yang. 2016. The cbfs triple mutants reveal  
680 the essential functions of CBFs in cold acclimation and allow the definition of CBF  
681 regulons in *Arabidopsis*. *New Phytologist* 212: 345-353.
- 682 Jmp. 1989-2019. JMP Version 13. SAS Institute Inc., Cary, NC.
- 683 Kang, J., H. Zhang, T. Sun, Y. Shi, J. Wang, B. Zhang, Z. Wang, et al. 2013. Natural variation of  
684 *C-repeat-binding factor* (CBFs) genes is a major cause of divergence in freezing  
685 tolerance among a group of *Arabidopsis thaliana* populations along the Yangtze River in  
686 China. *New Phytologist* 199: 1069-1080.
- 687 Karban, R. 2011. The ecology and evolution of induced resistance against herbivores. *Functional*  
688 *Ecology* 25: 339-347.
- 689 Kimura, M. 1983. *The Neutral Theory of Molecular Evolution*, 384. Cambridge University  
690 Press, Cambridge.
- 691 Kimura, M., Y. Y. Yamamoto, M. Seki, T. Sakurai, M. Sato, T. Abe, S. Yoshida, et al. 2003.  
692 Identification of *Arabidopsis* Genes Regulated by High Light–Stress Using cDNA  
693 Microarray *Photochemistry and Photobiology* 77: 226-233.



- 694 Koornneef, M., C. Alonso-Blanco, and D. Vreugdenhil. 2004. Naturally occurring genetic  
695 variation in *Arabidopsis thaliana*. *Annual Review of Plant Biology* 55: 141-172.
- 696 Krishnakumar, V., M. R. Hanlon, S. Contrino, E. S. Ferlant, S. Karamycheva, M. Kim, B. D.  
697 Rosen, et al. 2014. Araport: The *Arabidopsis* information portal. *Nucleic Acids Research*  
698 43: D1003-D1009.
- 699 Larcher, W. 1980. *Physiological Plant Ecology*, 32-33. Srping-Verlag, Berlin.
- 700 Leinonen, P. H., D. L. Remington, J. Leppälä, and O. Savolainen. 2013. Genetic basis of local  
701 adaptation and flowering time variation in *Arabidopsis lyrata*. *Molecular Ecology* 22:  
702 709-723.
- 703 Lowry, D. B., M. C. Hall, D. E. Salt, and J. H. Willis. 2009. Genetic and physiological basis of  
704 adaptive salt tolerance divergence between coastal and inland *Mimulus guttatus*. *New*  
705 *Phytologist* 183: 776-788.
- 706 MacArthur, R. H. 1972. *Geographical Ecology: Patterns in the Distribution of Species*. Princeton  
707 University Press, Princeton, New Jersey.
- 708 Martin, M. 2011. Cutadapt removes adapter sequences from high-throughput sequencing reads.  
709 *EMBnet.journal* 17: 10-12.
- 710 Maruyama, K., M. Takeda, S. Kidokoro, K. Yamada, Y. Sakuma, K. Urano, M. Fujita, et al.  
711 2009. Metabolic pathways involved in cold acclimation identified by integrated analysis  
712 of metabolites and transcripts regulated by DREB1A and DREB2A. *Plant Physiology*  
713 150: <https://doi.org/10.1104/pp.1109.135327>.
- 714 Mi, H., A. Muruganujan, D. Ebert, X. Huang, and P. D. Thomas. 2019. PANTHER version 14:  
715 more genomes, a new PANTHER GO-slim and improvements in enrichment analysis  
716 tools. *Nucleic Acids Research* 47: D419-D426.

- 717 Monroe, J. G., C. Mcgovern, J. R. Lasky, K. Grogan, J. Beck, and J. K. Mckay. 2016. Adaptation  
718 to warmer climates by parallel functional evolution of CBF genes in *Arabidopsis*  
719 *thaliana*. *Molecular Ecology* 25: 3632-3644.
- 720 Montesinos, A., S. J. Tonsor, C. Alonso-Blanco, and F. X. Pico. 2009. Demographic and genetic  
721 patterns of variation among populations of *Arabidopsis thaliana* from contrasting native  
722 environments. *PLoS ONE* 4: e7213.
- 723 Oakley, C. G., J. Ågren, R. A. Atchison, and D. W. Schemske. 2014. QTL mapping of freezing  
724 tolerance: links to fitness and adaptive trade-offs. *Molecular Ecology* 23: 4304-4315.
- 725 Oakley, C. G., L. Savage, S. Lotz, G. R. Larson, M. F. Thomashow, D. M. Kramer, and D. W.  
726 Schemske. 2018. Genetic basis of photosynthetic responses to cold in two locally adapted  
727 populations of *Arabidopsis thaliana*. *Journal of Experimental Botany* 69: 699-709.
- 728 Orr, H. A. 1998. The population genetics of adaptation: the distribution of factors fixed during  
729 adaptive evolution. *Evolution* 52: 935-949.
- 730 -----, 2005. The genetic theory of adaptation: a brief history. *Nature Reviews Genetics* 6: 119-  
731 127.
- 732 Park, S., S. J. Gilmour, R. Grumet, and M. F. Thomashow. 2018. CBF-dependent and CBF-  
733 independent regulatory pathways contribute to the differences in freezing tolerance and  
734 cold-regulated gene expression of two *Arabidopsis* ecotypes locally adapted to sites in  
735 Sweden and Italy. *PLoS ONE* 13: 1-24.
- 736 Park, S., C.-M. Lee, C. J. Doherty, S. J. Gilmour, Y. Kim, and M. F. Thomashow. 2015.  
737 Regulation of the *Arabidopsis* CBF regulon by a complex low-temperature regulatory  
738 network. *The Plant Journal* 82: 193-207.

- 739 Pfaffl, M. W. 2001. A new mathematical model for relative quantification in real time RT-PCR.  
740 *Nucleic Acids Research* 29: 2002-2007.
- 741 Postma, F. M., and J. Ågren. 2016. Early life stages contribute strongly to local adaptation in  
742 *Arabidopsis thaliana*. *Proceedings of the National Academy of Sciences of the United*  
743 *States of America* 113: 7590-7595.
- 744 Preston, J. C., and S. R. Sandve. 2013. Adaptation to seasonality and the winter freeze. *Frontiers*  
745 *in Plant Science* 4: 10.3389/fpls.2013.00167.
- 746 Puhakainen, T., M. W. Hess, P. Makela, J. Svensson, P. Heino, and E. T. Palva. 2004.  
747 Overexpression of multiple dehydrin genes enhances tolerance to freezing stress in  
748 *Arabidopsis*. *Plant Molecular Biology* 54: 743-753.
- 749 R. 2011. R: A Language and Environment for Statistical Computing.
- 750 Rausher, M. D., and L. F. Delph. 2015. Commentary: When does understanding phenotypic  
751 evolution require identification of the underlying genes? *Evolution* 69: 1655-1664.
- 752 Remington, D. L. 2015. Alleles versus mutations: Understanding the evolution of genetic  
753 architecture requires a molecular perspective on allelic origins. *Evolution* 69: 3025-3038.
- 754 Robinson, M. D., D. J. McCarthy, and G. K. Smyth. 2010. edgeR: a Bioconductor package for  
755 differential expression analysis of digital gene expression data. *Bioinformatics* 26: 139-  
756 140.
- 757 Rockman, M. V. 2011. The QTN program and the alleles that matter for evolution: all that's gold  
758 does not glitter. *Evolution* 66: 1-17.
- 759 Savolainen, O., M. Lascoux, and J. Merilä. 2013. Ecological genomics of local adaptation.  
760 *Nature Reviews Genetics* 14: 807-820.

- 761 Sazegari, S., A. Niazi, and F. S. Ahmadi. 2015. A study on the regulatory network with promoter  
762 analysis for *Arabidopsis DREB*-genes. *Bioinformation* 11: 101-106.
- 763 Shi, Y., J. Huang, T. Sun, X. Wang, C. Zhu, Y. Ai, and H. Gu. 2017. The precise regulation of  
764 differednt COR genes by individual CBF transcription factors in *Arabidopsis thaliana*.  
765 *Journal of Integrative Biology* 59: 118-133.
- 766 Singh, S., C. C. Cornilescu, R. C. Tyler, G. Cornilescu, M. Tonelli, M. S. Lee, and J. L. Markley.  
767 2005. Solution structure of a late embryogenesis abundant protein (LEA14) from  
768 *Arabidopsis thaliana*, a cellular stress-related protein. *Protein Science* 14: 2601-2609.
- 769 Smallwood, M., and D. J. Bowles. 2002. Plants in a cold climate. *Philosophical Transactions of*  
770 *the Royal Society B* 357: 831-847.
- 771 Su, C., K. Chen, Q. Ding, Y. Mou, R. Yang, M. Zhao, B. Ma, et al. 2018. Proteomic Analysis of  
772 the Function of a Novel Cold-Regulated Multispanning Transmembrane Protein  
773 COR413-PM1 in *Arabidopsis*. *International Journal of Molecular Sciences* 19:  
774 doi:10.3390/ijms19092572.
- 775 Taji, T., C. Ohsumi, S. Iuchi, M. Seki, M. Kasuga, M. Kobayashi, K. Yamaguchi-Shinozaki, and  
776 K. Shinozaki. 2002. Important roles of drought- and cold-inducible genes for galactinol  
777 synthase in stress tolerance in *Arabidopsis thaliana*. *The Plant Journal* 29: 417-426.
- 778 Thomashow, M. F. 1999. Plant cold acclimation: freezing tolerance genes and regulatory  
779 mechanisms. *Annual Review of Plant Physiology and Plant Molecular Biology* 50: 571-  
780 599.
- 781 -----, 2010. Molecular basis of plant cold acclimation: insights gained from studying the CBF  
782 cold response pathway. *Plant Physiology* 154: 571-577.

- 783 Tiffin, P., and J. Ross-Ibarra. 2014. Advances and limits of using population genetics to  
784 understand local adaptation. *Trends in Ecology & Evolution* 29: 673-680.
- 785 Trapnell, C., A. Roberts, L. Goff, G. Pertea, D. Kim, D. R. Kelley, H. Pimentel, et al. 2012.  
786 Differential gene and transcript expression analysis of RNA-seq experiments with  
787 TopHat and Cufflinks. *Nature Protocols* 7: doi:10.1038/nprot.2012.1016.
- 788 Vanwallendael, A., A. Soltani, N. C. Emery, M. M. Peixoto, J. Olsen, and D. B. Lowry. 2019. A  
789 Molecular View of Plant Local Adaptation: Incorporating Stress-Response Networks.  
790 *Annual Review of Plant Biology* 70: 14.11-14.25.
- 791 Wang, S., E. Meyer, J. K. McKay, and M. V. Matz. 2012. 2b-RAD: a simple and flexible method  
792 for genome-wide genotyping. *Nature Methods* 9: 808-812.
- 793 Warnes, G. R., B. M. Bolker, L. Bonebakker, R. Gentleman, W. H. A. Liaw, T. Lumley, M.  
794 Maechler, et al. 2019. gplots: various R programming tools for plotting data, version R  
795 package version 3.0.1.1. website: <https://CRAN.R-project.org/package=gplots>.
- 796 Whitlock, M. C. 1996. The red queen beats the jack-of-all-trades: the limitations on the evolution  
797 of phenotypic plasticity and niche breadth. *American Naturalist* 148: S65-S77.
- 798 Zhao, C., Z. Zhang, S. Xie, T. Si, Y. Li, and J.-K. Zhu. 2016. Mutational Evidence for the  
799 Critical Role of CBF Transcription Factors in Cold Acclimation in Arabidopsis. *Plant*  
800 *Physiology* 171: 2744-2759.
- 801 Zhen, Y., and M. C. Ungerer. 2008. Relaxed selection on the *CBF/DREB1* regulatory genes and  
802 reduced freezing tolerance in the southern range of *Arabidopsis thaliana*. *Molecular*  
803 *Biology and Evolution* 25: 2547-2555.
- 804 Zhen, Y., P. Dhakal, and M. C. Ungerer. 2011. Fitness benefits and costs of cold acclimation in  
805 *Arabidopsis thaliana*. *American Naturalist* 178: 44-52.

806 Zuther, E., Y. P. Lee, A. Erban, J. Kopka, and D. K. Hinch. 2018. Natural variation in freezing  
807 tolerance and acclimation response in *Arabidopsis thaliana* and related species. In M.  
808 Iwaya-Inoue, M. Sakurai, and M. Uemura [eds.], *Survival Strategies in Extreme Cold and*  
809 *Dessication*. Springer Singapore, Singapore.  
810

811 **TABLES**

812 **Table 1.** Least square mean freezing tolerance (FrzTol) for each of the six lines in the study.

813 Also given is the reduction in FrzTol of each line compared to SW and results of the linear

814 contrast from the ANOVA testing the significance of this difference. The final column gives the

815 percent of the difference between SW and IT explained by each of the CBF2 loss of function

816 lines in the SW background.

817

| Line      | FrzTol (%) | Reduction compared to SW | Linear contrast compared to SW | Percent difference between SW and IT explained (%) |
|-----------|------------|--------------------------|--------------------------------|----------------------------------------------------|
| SW        | 71.9       | n/a                      | n/a                            | n/a                                                |
| NIL R37   | 58.8       | 13.1                     | $F_{1,688} = 24.8, P < 0.001$  | 21.7                                               |
| NIL R38   | 50.4       | 21.5                     | $F_{1,687} = 66.5, P < 0.001$  | 35.5                                               |
| SW:cbf2 b | 51.1       | 20.8                     | $F_{1,696} = 54.1, P < 0.001$  | 34.4                                               |
| SW:cbf2 a | 46.2       | 25.7                     | $F_{1,695} = 85.7, P < 0.001$  | 42.5                                               |
| IT        | 11.4       | 60.5                     | $F_{1,690} = 490.5, P < 0.001$ | n/a                                                |

818

819 **Table 2.** Differential gene expression between pre- and post-cold acclimated plants from SW and  
 820 IT ecotypes for the 10 genes that were identified as having a significant genotype by treatment  
 821 interaction ( $P_{FDR} \leq 0.05$  for the comparison of IT to SW, and  $P < 0.05$  for all pairwise  
 822 comparisons between each line and SW). Values are  $\log_2$  fold change, e.g. a value of 1  
 823 represents a 2-fold difference, in expression ( $LFC_{caSW}$  and  $LFC_{caIT}$  as calculated by Equation 1,  
 824 and  $LFC_{caSW} - LFC_{caIT}$  as calculated by Equation 2).

| Alias      | Gene      | $LFC_{caSW}$ | $LFC_{caIT}$ | $LFC_{caSW} - LFC_{caIT}$ |
|------------|-----------|--------------|--------------|---------------------------|
| GolS3      | AT1G09350 | 6.36         | 3.81         | 2.55                      |
| NA         | AT4G30830 | 4.15         | 1.42         | 2.73                      |
| LEA14      | AT1G01470 | 2.35         | 1.42         | 0.94                      |
| CCT2       | AT4G15130 | 1.91         | 1.04         | 0.88                      |
| COR413-PM1 | AT2G15970 | 2.24         | 1.24         | 1.00                      |
| ERD10      | AT1G20450 | 2.70         | 1.14         | 1.56                      |
| COR47      | AT1G20440 | 2.05         | 0.23         | 1.82                      |
| ERD7       | AT2G17840 | 2.38         | 0.84         | 1.54                      |
| NA         | AT3G55760 | 1.18         | -0.37        | 1.55                      |
| DEAR3      | AT2G23340 | 0.43         | -0.46        | 0.88                      |

825



826 **FIGURE LEGENDS**

827 **Figure 1.** Mean freezing tolerance of SW, IT, and the two NILs and two CRISPR mutant lines  
828 containing *CBF2* loss of function alleles in the SW background. Error bars are 1 SE. Linear  
829 contrasts comparing SW to each of the other lines were all highly significant (Table 1).

830

831 **Figure 2.** Log<sub>2</sub> CPM for the most highly cold responsive genes of the 10 candidates before (left  
832 group of bars) and after (right group of bars) cold acclimation.

833

834 **Figure 3.** Log<sub>2</sub> CPM for the remaining highly cold responsive genes of the 10 candidates before  
835 (left group of bars) and after (right group of bars) cold acclimation.

836

837 **SUPPLEMENTARY MATERIAL**

838 **Table S1.** List of genes with significant gene by environment interactions in our study for the  
839 pairwise comparison of IT to SW ( $P_{FDR} \leq 0.05$ ). F, PValue, and FDR refer to the significance  
840 test of the interaction term.

841

842 **Table S2.** Gene ontology enrichment for the 249 genes with significant genotype by  
843 environment interactions for the pairwise comparison of IT to SW ( $P_{FDR} \leq 0.05$ ).

844

845 **Table S3.** List of genes with significant differences in cold responsive expression between SW  
846 and NIL R37 ( $P$  value  $< 0.05$ ), and which also in Table S1. F, PValue, and FDR refer to the  
847 significance test of the interaction term.

848

849 **Table S4.** List of genes with significant differences in cold responsive expression between SW  
850 and NIL R38 ( $P$  value  $< 0.05$ ), and which also in Table S1. F, PValue, and FDR refer to the  
851 significance test of the interaction term.

852

853 **Table S5.** List of genes with significant differences in cold responsive expression between SW  
854 and CRISPR line cbf2 a ( $P$  value  $< 0.05$ ), and which also in Table S1. F, PValue, and FDR refer  
855 to the significance test of the interaction term.

856

857 **Table S6.** List of genes with significant differences in cold responsive expression between SW  
858 and CRISPR line cbf2 b ( $P$  value  $< 0.05$ ), and which also in Table S1. F, PValue, and FDR refer  
859 to the significance test of the interaction term.

860

861 **Table S7.** List of genes with significant gene by environment interactions in our study for the  
862 pairwise comparison of IT to SW ( $P_{FDR} \leq 0.05$ ) that are included among those identified by  
863 Gehan et al. (2015).

864

865 **Table S8.** List of genes with significant gene by environment interactions in our study for the  
866 pairwise comparison of IT to SW ( $P_{FDR} \leq 0.05$ ), which are not present in Gehan et al. (2015).

867

868 **Table S9.** Comparison of genes included in Figure S5 with previously published CBF regulons  
869 from four genetic backgrounds. SW and IT from Park et al. (2018), Col-0 from Zhao et al.  
870 (2016), and WS from Park et al. (2015).

871

872 **Figure S1.** Three transcription factor encoding CBF genes in tandem array in the SW and IT  
873 ecotypes, and two lines with CRISPR-induced mutations in the *CBF2* gene. Open boxes indicate  
874 *CBF1*, *CBF2*, and *CBF3* coding regions (shaded portion indicates DNA binding domain) in the  
875 order they are arranged in the genome. The green lines indicate the transcription activation  
876 domains. The filled triangles indicate site of the naturally occurring 13 bp deletion in the IT  
877 *CBF2* gene. Open triangles indicate the two independent CRISPR induced deletion. SW:cbf2 a is  
878 the same as in Park et al. (2018).

879

880 **Figure S2.** Distribution of mean freezing tolerance values per cell. The distribution of values for  
881 all six lines combined are given in black, and the distribution of values for just IT are given in  
882 red.

883

884 **Figure S3.** Heat map of expression differences for the 249 genes that were identified as having a  
885 significant genotype by treatment interaction ( $P_{FDR} \leq 0.05$  for the comparison of IT to SW). The  
886 value of each cell represents the  $\log_2$  transformed fold-change in gene expression, calculated as  
887 the quotient of normalized counts-per-million averages for each line between cold and warm  
888 treatments. Yellow-red color represents genes that are highly expressed in the cold treatment,  
889 while black-purple color represents genes that are highly expressed in the warm treatment. Plot  
890 generated using the heatmap.2 function in the R package plots (Warnes et al., 2019).

891

892 **Figure S4.** Venn diagram of genes with a significant genotype by treatment interaction ( $P_{FDR} \leq$   
893 0.05) between IT and SW, and  $P < 0.05$  for each pairwise comparison of the NILs and CRISPR

894 lines to SW. Plot generated using the `venn.diagram` function in the R package `VennDiagram`  
895 (Chen, 2018).

896

897 **Figure S5.** Heat map of expression differences for the 10 genes that were identified as having a  
898 significant genotype by treatment interaction ( $P_{FDR} \leq 0.05$  for the comparison of IT to SW, and  $P$   
899  $< 0.05$  for all pairwise comparisons between each line and SW). The value of each cell represents  
900 the  $\log_2$  transformed fold-change in gene expression, calculated as the quotient of normalized  
901 counts-per-million averages for each line between cold and warm treatments. Yellow-red color  
902 represents genes that are highly expressed in the cold treatment, while black-purple color  
903 represents genes that are highly expressed in the warm treatment. Plot generated using the  
904 `heatmap.2` function in the R package `plots` (Warnes et al., 2019).

905

906 **Figure S6.**  $\log_2$  CPM for the least responsive genes of the 10 candidates before (left group of  
907 bars) and after (right group of bars) cold acclimation.

908

909 **Figure S7.** Relative expression for *Gols3* and *COR413-PMI* quantified by RT-qPCR,  
910 normalized to expression of the housekeeping gene *ACT2*. Each biological replicate was run in  
911 triplicate for three technical replicates. Points are means of three biological replicates, and error  
912 bars are the standard error of those means. Primer sequences used are as follows: *Gols3* F: 5-  
913 TGTGCCAAAGCTCCATCCGC-3, *Gols3* R: 5-TGGTGTGACAAGAACCTCGCT-3,  
914 *COR413-PMI* F: 5-TGCTGGCACATTCAGAGACAG-3, *COR413-PMI* R: 5-  
915 CAGACGGGGAAGACGACGAGA-3, *ACT2* F: 5-CTGGATCGGTGGTTCCATTC-3, *ACT2*  
916 R: 5-CCTGGACCTGCCTCATCATAC-3.

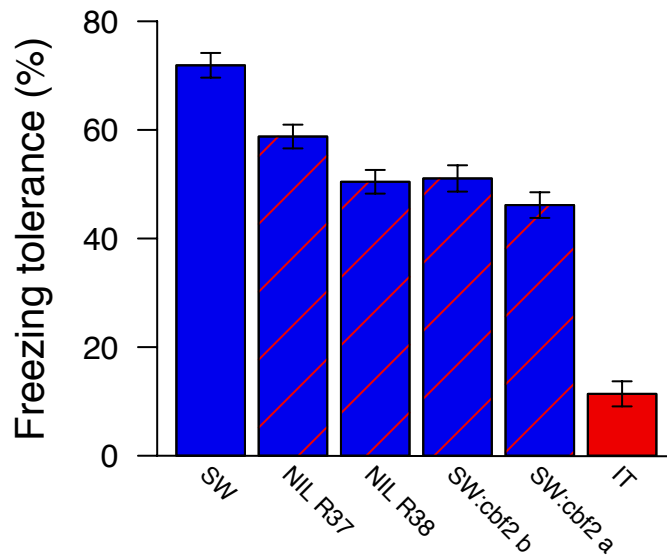

**Figure 1.** Mean freezing tolerance of SW, IT, and the two NILs and two CRISPR mutant lines containing *CBF2* loss of function alleles in the SW background. Error bars are 1 SE. Linear contrasts comparing SW to each of the other lines were all highly significant (Table 1).

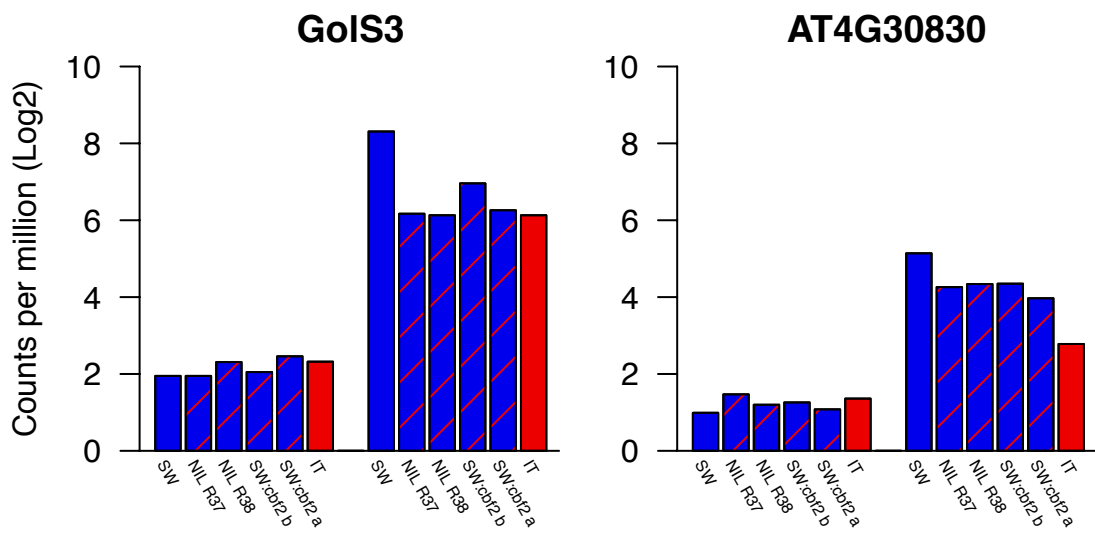

**Figure 2.** Log<sub>2</sub> CPM for the most highly cold responsive genes of the 10 candidates before (left group of bars) and after (right group of bars) cold acclimation.

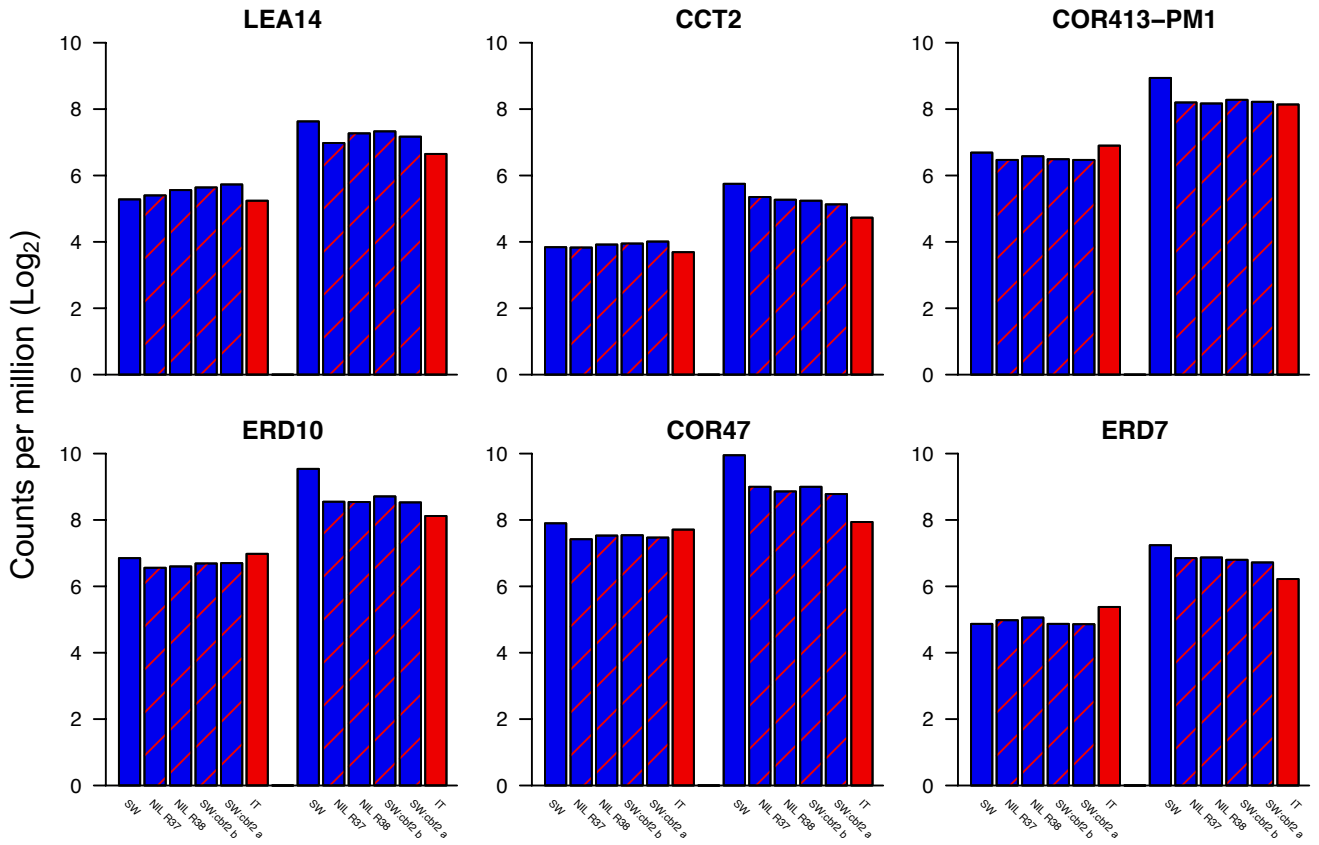

**Figure 3.** Log<sub>2</sub> CPM for the remaining highly cold responsive genes of the 10 candidates before (left group of bars) and after (right group of bars) cold acclimation.
